# Supplementary material
Source: Springer Nature journal article supplement (https://www.springermedizin.de/resource/supplementary/12943_2009_521_MOESM2_ESM.pdf/9555004)

PI

Ctrl

FSK

TNF- $\alpha$ TNF- $\alpha$ +FSK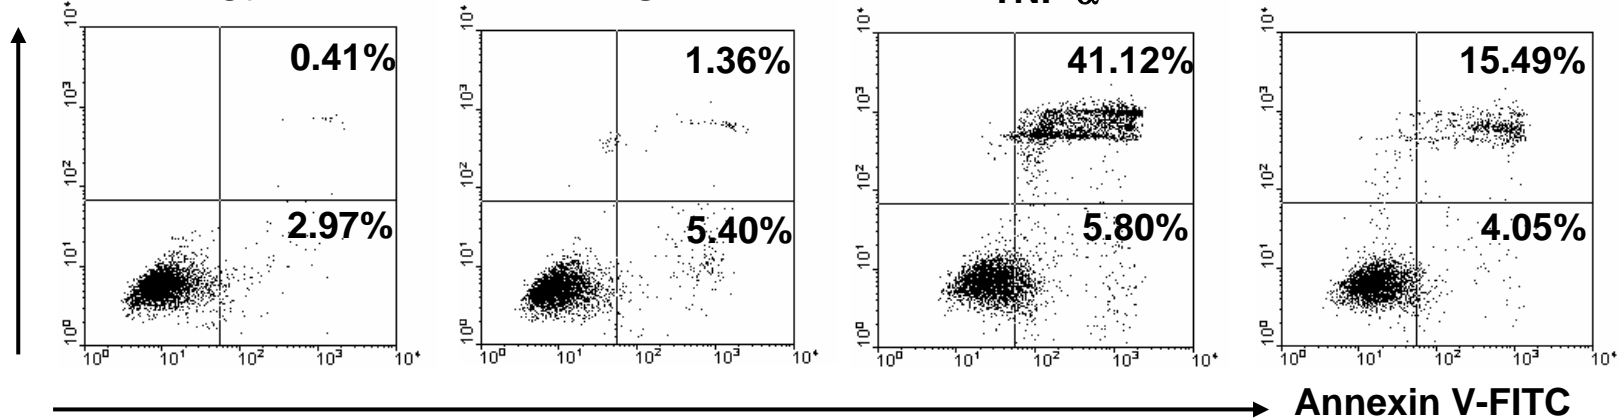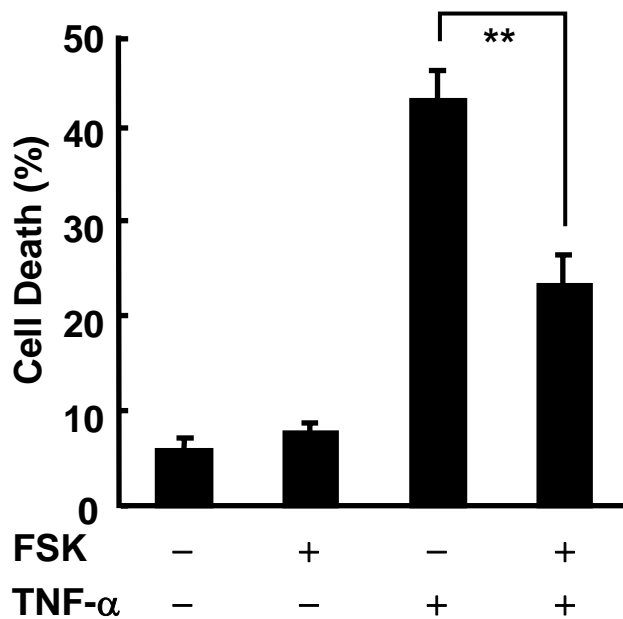

Supplement: MOESM2 [file 9555004]
